# Supplementary figures and images for: De militaire cultuur van de Nederlandse krijgsmacht tussen 1970 en 2000
Source: eLife journal article supplement (doi:10.7554/elife.26268), 2012-03-20

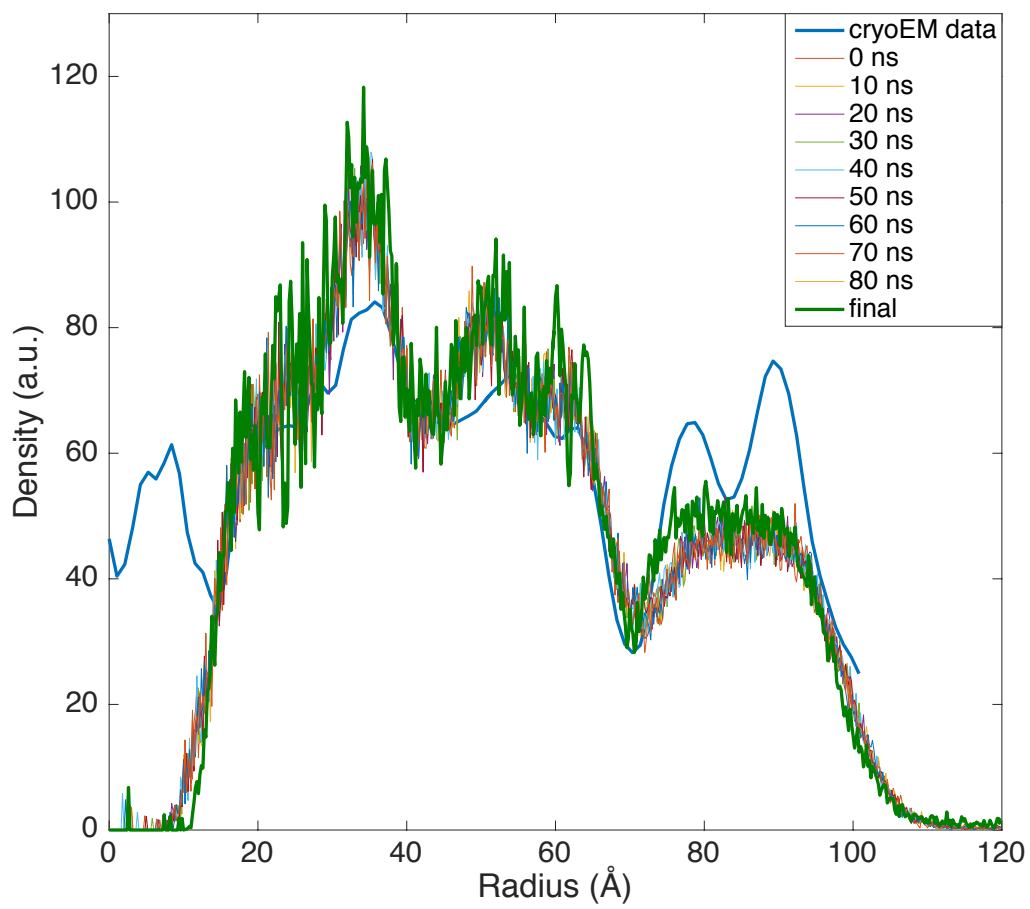

Supplement: supp [file elife-26268-supp-v1.zip]
